# Supplementary material
Source: MDPI journal article supplement (https://www.mdpi.com/2075-163X/11/2/216)
Supplement: s1 [file s1]

## Sheet: Sheet1
Table S1. Mӧssbuer Spectrocopy parameter data of Fe-bearing dust minerals in samples from metallurgy
Sample source	Sample number	IS (mm/s)	QS (mm/s)	Line-width (mm/s)	Intensity (%)	Oxidation state	Hf (Tesla)	χ2	Fe-bearing minerals
Scale	7	0.37	-0.16	0.32	21	3+	52.1	41640	hematite
		0.35	0	0.32	19	3+	49.7		magnetite
		0.38	0	0.42	30	2.5+	46.2		magnetite
		0.9	0.7	0.58	30	2+	0		wustite
De-dusting	8	0.4	0	0.75	14	3+	47.7	0.86	magnetite
		0.65	0	0.75	8	2.5+	40.5		magnetite
		0.31	0.43	0.59	78	3+	0		franklinite
Steel-making	16	0.32	0	0.75	12	3+	43.9	0.79	magnetite
		0.6	0	0.75	9	2.5+	36.8		magnetite
		0.31	0.4	0.55	69	3+	0		franklinite
	17	0.39	0	0.75	21	3+	48.4	0.79	jacobsite
		0.4	0	0.75	16	3+	42.1		jacobsite
		0.31	0.43	0.66	63	3+	0		franklinite
	18	0.37	-0.16	0.46	21	3+	52.4	0.78	hematite
		0.37	-0.21	0.46	20	3+	50.6		hematite
		0.33	0	0.46	15	3+	50.1		magnetite
		0.25	0	0.6	13	3+	47.6		magnetite
		0.64	0	0.46	7	2.5+	46.9		magnetite
		0.67	0	0.6	12	2.5+	45.2		magnetite
		2021-03-01	0.63	0.6	3	2+	0		wustite
		0.19	0.42	0.6	9	3+	0		glass
Steel-making	19	0.37	-0.13	0.3	8	3+	51.6	0.74	hematite
		0.31	0	0.43	20	3+	49.3		magnetite
		0.63	0	0.43	15	2.5+	45.6		magnetite
		0.03	0	0.6	7	0	33.2		alpha-Fe
		0.24	0.47	0.6	9	3+	41.4		srebrodoloscite
		0.25	0.13	0.6	18	3+	45.9		srebrodoloscite
		0.27	0.81	0.55	7	3+	0		srebrodoloscite
		2021-06-01	0.66	0.55	3	2+	0		wustite
		2021-02-01	1938-01-01	0.55	5	2+	0		calcite
		0.17	0.38	0.55	16	3+	0		glass
Sinter dust	20	0.37	-0.17	0.38	23	3+	52.3	22282	hematite
		0.37	-0.19	0.38	24	3+	50.8		hematite
		0.26	0	0.38	10	3+	49.5		magnetite
		0.25	0	0.38	7	3+	47.8		magnetite
		0.64	0	0.38	17	2.5+	46.9		magnetite
		0.68	0	0.38	15	2.5+	45.5		magnetite
		0.25	0.47	0.6	7	3+	0		glass
Fe-bearing sludge	22	0.37	-0.17	0.3	17	3+	51.9	0.69	hematite
		0.29	0	0.34	10	3+	49.5		magnetite
		0.64	0	0.34	12	2.5+	46.1		magnetite
		0	0	0.3	20	0	33.1		alpha-Fe
		2021-05-01	0.6	0.49	24	2+	0		wustite
		2021-02-01	1939-01-01	0.49	3	2+	0		calcite
		0.19	0.38	0.49	14	3+	0		glass
	23	0.38	0	0.7	8	3+	49.4	0.69	magnetite
		0.6	0	0.7	7	2.5+	45.1		magnetite
		0.04	0	0.42	32	0	33.2		alpha-Fe
		2021-05-01	0.61	0.6	38	2+	0		wustite
		2021-02-01	2021-04-01	0.6	3	2+	0		calcite
		0.2	0.38	0.6	12	3+	0		glass
